# Supplementary material for: Dietary Intake of Multiple Nutrient Elements and Associated Health Effects in the Chinese General Population from a Total Diet Study
Source: MDPI journal article supplement (doi:10.3390/nu15112613), 2023-06-02
Supplement: s1 [file s1]

# Dietary Intake of Multiple Nutrient Elements and Associated Health Effects in the Chinese General Population from a Total Diet Study

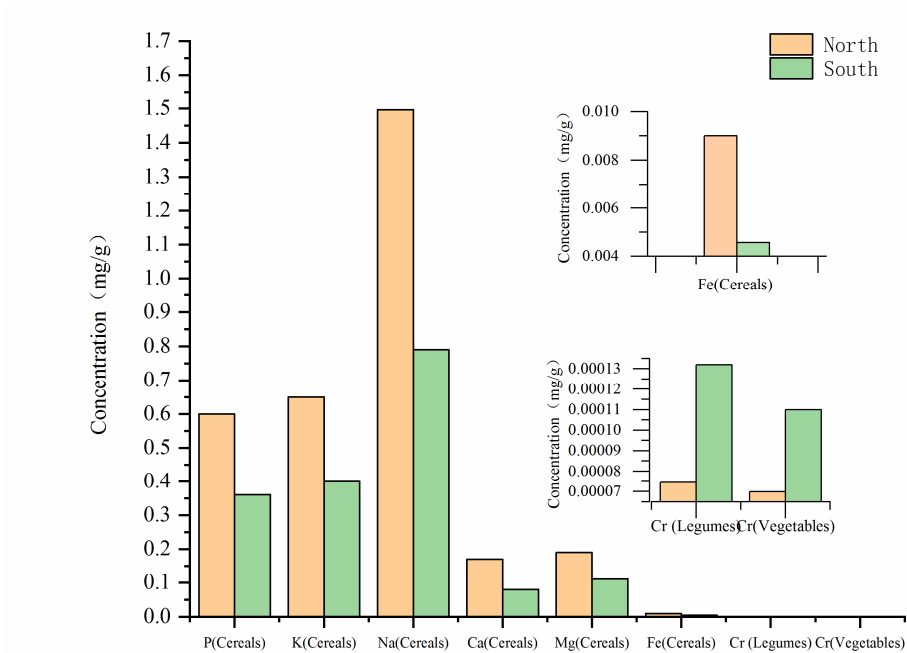

**Figure S1.** Regional differences in elemental content of cereals (Na, K, P, Ca, Mg, Fe), legumes (Cr), and vegetables (Cr).

**Table S1.** International and national guidance values for the intake of nutrient elements.

|            | WHO<br>(WHO, 2012a;<br>WHO, 2012b) | Australia and New Zealand<br>(NHMRC, 2017) |           | Canada<br>(HC, 2010) |            | US<br>(FNB, 2019) |            | Cuban<br>(INHA and the Cuban Ministry of<br>Public Health, 2008) |                | Oman<br>(Alasfoor et al.,<br>2009) |
|------------|------------------------------------|--------------------------------------------|-----------|----------------------|------------|-------------------|------------|------------------------------------------------------------------|----------------|------------------------------------|
|            | PI–NCD                             | RDI/ AI                                    | UL        | RDA/AI               | UL         | RDA/AI            | UL         | DRI/AI                                                           | UL             | RNI                                |
| Sodium     | 2000 mg/d                          | *460–920 mg/d                              | ND        | *1500 mg/d           | 2300 mg/d  | *1500 mg/d        | ND         | 500 mg/d                                                         | 2.3 g/d        | 5.3–6.0 g/d                        |
| Potassium  | 3510 mg/d                          | *2800 mg/d                                 | NP        | *4700 mg/d           | ND         | *3400 mg/d        | ND         | 2000 mg/d                                                        | 3500 mg/d      | –                                  |
| Calcium    | –                                  | 1000 mg/d                                  | 2500 mg/d | 1000 mg/d            | 2500 mg/d  | 1000 mg/d         | 2500 mg/d  | *800 mg/d                                                        | 2500 mg/d      | 525–960 mg/d                       |
| Phosphorus | –                                  | 1000 mg/d                                  | 4000 mg/d | 700 mg/d             | 4000 mg/d  | 700 mg/d          | 4 g/d      | 800 mg/d                                                         | 4000 mg/d      | –                                  |
| Magnesium  | –                                  | 310–320 mg/d                               | 350 mg/d  | 400–420 mg/d         | 350 mg/d   | 400–420 mg/d      | 350 mg/d   | 325 mg/d                                                         | 350 mg/d       | –                                  |
| Iron       | –                                  | 18 mg/d                                    | 45 mg/d   | 8 mg/d               | 45 mg/d    | 8 mg/d            | 45 mg/d    | 17 mg/d                                                          | 45 mg/d        | 11.6–13.2 mg/d                     |
| Selenium   | –                                  | 60 µg/d                                    | 400 µg/d  | 55 µg/d              | 400 µg/d   | 55 µg/d           | 400 µg/d   | 55 µg/d                                                          | 400 µg/d       | –                                  |
| Manganese  | –                                  | *5.0 mg/d                                  | NP        | *2.3 mg/d            | 11 mg/d    | *2.3 mg/d         | 11 mg/d    | *2 mg/d                                                          | 11 mg/d        | –                                  |
| Zinc       | –                                  | 8 mg/d                                     | 40 mg/d   | 11 mg/d              | 40 mg/d    | 11 mg/d           | 40 mg/d    | 12 mg/d                                                          | 40 mg/d        | 21–24 mg/d                         |
| Copper     | –                                  | *1.2 mg/d                                  | 10 mg/d   | 900 µg/d             | 10000 µg/d | 900 µg/d          | 10000 µg/d | 900 µg/d                                                         | 10000 µg/d     | –                                  |
| Iodine     | –                                  | 150 µg/d                                   | 1100 µg/d | 150 µg/d             | 1100 µg/d  | 150 µg/d          | 1100 µg/d  | 150 µg/d                                                         | 1100 ug/d      | 158–180 µg/d                       |
| Molybdenum | –                                  | 45 µg/d                                    | 2000 µg/d | 45 µg/d              | 2000 µg/d  | 45 µg/d           | 2000 µg/d  | 45 µg/d                                                          | 1700–2000 µg/d | –                                  |
| Chromium   | –                                  | *25 µg/d                                   | NP        | *35 µg/d             | ND         | *35 mg/d          | ND         | *35 µg/d                                                         | ND             | –                                  |

\*Adequate Intakes (AIs) in ordinary type.

NP, not possible to set may be insufficient evidence or no clear level for adverse effects; ND, not determined – reflecting the inability to identify a single point below which there is low risk.

**Table S2.** Contents of element in standard reference materials for method validation and quality control (mg/kg).

| standard reference materials |                  | Na              | K             | Ca             | Mg             | P             | Mn          | Fe          | Zn         | Cu        | Se          | Mo          |
|------------------------------|------------------|-----------------|---------------|----------------|----------------|---------------|-------------|-------------|------------|-----------|-------------|-------------|
| SRM<br>1568b                 | certified value  | 6.74±0.19       | 1282±11       | 118.4±3.1      | 559±10         | 1530±40       | 19.2±1.8    | 7.42±0.44   | 19.42±0.26 | 2.35±0.16 | 0.365±0.029 | 1.451±0.048 |
|                              | determined value | 6.57            | 1273          | 120            | 553            | 1543          | 19.2        | 7.56        | 18.63      | 2.4       | 0.341       | 1.412       |
| SRM<br>1570a                 | certified value  | 1.818 ±0.043%   | 2.903± 0.052% | 1.527± 0.041%  | —              | 0.518±0.011%  | 75.9±1.9    | —           | 82±3       | 12.2±0.6  | 0.117±0.009 | —           |
|                              | determined value | 1.80%           | 2.881%        | 1.546%         | —              | 0.511%        | 77.1        | —           | 84         | 12.3      | 0.119       | —           |
| SRM<br>1577c                 | certified value  | 0.2033± 0.0064% | 1.023±0.064%  | 131±10         | 620±42         | —             | 10.46±0.47  | 197.94±0.65 | 181.1±1.0  | 275.2±4.6 | 2.031±0.045 | 3.30±0.13   |
|                              | determined value | 0.20%           | 1.01%         | 134            | 604            | —             | 10.33       | 197.51      | 179        | 275.8     | 1.996       | 3.21        |
| ERM-<br>BD150                | certified value  | 4.18±0.19 g/kg  | 17.0±0.7 g/kg | 13.9±0.8 g/kg  | 1.26±0.10 g/kg | 11.0±0.6 g/kg | 0.289±0.018 | 4.6±0.5     | 44.8±2.0   | 1.08±0.06 | 0.188±0.014 | —           |
|                              | determined value | 4.26 g/kg       | 16.4 g/kg     | 14.3 g/kg      | 1.29 g/kg      | 11.1 g/kg     | 0.31        | 4.4         | 43.6       | 1.04      | 0.181       | —           |
| ERM-<br>BD151                | certified value  | 4.19±0.23 g/kg  | 17.0±0.8 g/kg | 13.9±0.7 g/kg  | 1.26±0.07g/kg  | 11.0±0.6 g/kg | 0.29±0.03   | 53±4        | 44.9±2.3   | 5.00±0.23 | 0.19±0.04   | —           |
|                              | determined value | 4.37 g/kg       | 16.9 g/kg     | 13.6 g/kg      | 1.30 g/kg      | 10.8 g/kg     | 0.28        | 50          | 47.0       | 4.81      | 0.16        | —           |
| SRM<br>1566b                 | certified value  | 0.3297±0.0053%  | 0.652±0.009%  | 0.0838±0.0020% | 0.1085±0.0023% | —             | 18.5±0.2    | 205.8±6.8   | 1424±46    | 71.6±1.6  | 2.06±0.15   | —           |
|                              | determined value | 0.33%           | 0.64%         | 0.02%          | 0.109%         | —             | 18.6        | 211.6       | 1436       | 72.6      | 1.96        | —           |

**Table S3.** Concentrations of nutrient elements in diet samples from the 6<sup>th</sup> China TDS.

| Category          | Mean (Range) |             |             |             |             |             |               |               |             |               |               |              |
|-------------------|--------------|-------------|-------------|-------------|-------------|-------------|---------------|---------------|-------------|---------------|---------------|--------------|
|                   | Na (mg/g)    | K (mg/g)    | Ca (mg/g)   | Mg (mg/g)   | P (mg/g)    | Mn (mg/kg)  | Fe (mg/kg)    | Zn (mg/kg)    | Cu (mg/kg)  | Se (µg/kg)    | Mo (µg/kg)    | Cr (µg/kg)   |
| Cereals           | 1.14         | 0.53        | 0.13        | 0.15        | 0.48        | 3.33        | 6.77          | 3.92          | 0.94        | 10.1          | 143.7         | 86.8         |
|                   | (0.44–2.21)  | (0.31–0.92) | (0.04–0.24) | (0.07–0.29) | (0.20–0.75) | (2.11–4.49) | (0.69–3.89)   | (2.47–5.96)   | (0.67–1.52) | (0.2–35.4)    | (91.8–245.6)  | (4.7–430.8)  |
| Legumes           | 3.78         | 2.48        | 1.40        | 0.79        | 1.63        | 8.74        | 22.27         | 7.96          | 2.68        | 19.3          | 379.3         | 103.1        |
|                   | (1.89–7.10)  | (1.13–4.67) | (0.51–2.72) | (0.39–1.69) | (0.95–2.21) | (3.71–15.1) | (11.77–41.31) | (3.52–13.06)  | (1.34–3.58) | (0.1–65.0)    | (142.9–680.8) | (22.6–667.9) |
| Potatoes          | 4.47         | 2.04        | 0.14        | 0.16        | 0.33        | 2.95        | 12.64         | 1.52          | 0.66        | 6.7           | 22.4          | 129.6        |
|                   | (0.60–8.38)  | (0.60–3.43) | (0.08–0.30) | (0.05–0.39) | (0.21–0.52) | (0.59–8.59) | (5.29–27.63)  | (0.42–3.61)   | (0.25–1.41) | (ND–22.7)     | (ND–57.6)     | (19.9–756.3) |
| Meats             | 8.11         | 2.62        | 0.26        | 0.25        | 1.65        | 1.33        | 19.89         | 15.60         | 1.03        | 128.0         | 33.3          | 140.6        |
|                   | (5.69–11.25) | (1.51–4.48) | (0.06–1.47) | (0.12–0.39) | (1.09–2.26) | (0.24–2.76) | (8.97–36.67)  | (10.63–27.07) | (0.47–2.31) | (82.5–186.4)  | (6.4–74.2)    | (28.3–856.0) |
| Eggs              | 7.48         | 1.50        | 0.54        | 0.17        | 2.21        | 0.67        | 21.80         | 10.86         | 0.76        | 230.0         | 53.0          | 77.0         |
|                   | (1.45–14.78) | (0.99–2.56) | (0.33–0.71) | (0.10–0.23) | (1.15–2.84) | (0.29–1.67) | (15.90–44.01) | (7.58–14.00)  | (0.46–1.03) | (118.0–410.2) | (32.8–126.0)  | (0.7–381.6)  |
| Aquatic foods     | 6.70         | 2.82        | 0.75        | 0.33        | 1.78        | 1.15        | 16.08         | 8.61          | 1.04        | 214.9         | 7.5           | 81.1         |
|                   | (3.50–10.96) | (2.16–3.94) | (0.25–1.94) | (0.13–0.53) | (1.08–3.03) | (0.16–2.71) | (5.28–45.39)  | (4.48–22.51)  | (0.24–3.65) | (109.0–336.2) | (ND–24.9)     | (11.2–264.3) |
| Dairy products    | 0.36         | 1.72        | 1.24        | 0.15        | 1.13        | 0.04        | 0.77          | 3.53          | 0.04        | 25.9          | 36.6          | 4.9          |
|                   | (0.28–0.52)  | (1.32–2.27) | (0.91–1.84) | (0.11–0.29) | (0.78–1.67) | (0.02–0.08) | (0.09–7.58)   | (2.65–5.01)   | (0.02–0.07) | (13.3–51.0)   | (27.4–48.0)   | (0.5–27.0)   |
| Vegetables        | 5.59         | 2.33        | 0.43        | 0.17        | 0.34        | 2.47        | 12.52         | 1.90          | 0.46        | 7.0           | 66.0          | 90.5         |
|                   | (3.27–7.61)  | (1.57–3.82) | (0.28–0.82) | (0.09–0.29) | (0.23–0.51) | (1.41–4.51) | (4.68–39.40)  | (1.25–3.25)   | (0.28–0.79) | (0.6–18.6)    | (18.9–378.5)  | (20.6–292.8) |
| Fruits            | 0.01         | 1.59        | 0.08        | 0.13        | 0.12        | 1.76        | 2.47          | 0.46          | 0.44        | 2.6           | 6.3           | 30.9         |
|                   | (0.00–0.03)  | (1.08–1.99) | (0.03–0.33) | (0.08–0.18) | (0.07–0.17) | (0.41–6.82) | (0.88–8.75)   | (0.19–2.05)   | (0.30–0.64) | (0.1–10.1)    | (0.3–17.9)    | (2.4–316.0)  |
| Sugar             | 0.08         | 0.75        | 0.15        | 0.12        | 0.07        | 0.58        | 4.37          | 0.43          | 0.27        | 3.1           | 2.9           | 55.9         |
|                   | (0.00–0.47)  | (0.01–4.15) | (0.01–0.95) | (0.00–1.04) | (0.00–1.56) | (0.03–4.71) | (0.00–51.58)  | (ND–7.39)     | (0.00–5.09) | (0.1–21.1)    | (0.3–41.98)   | (0.5–585.7)  |
| Water & beverages | 0.02         | 0.05        | 0.04        | 0.02        | 0.008       | 0.63        | 0.18          | 0.08          | 0.02        | 0.5           | 1.7           | 3.7          |
|                   | (0.01–0.05)  | (0.00–0.24) | (0.01–0.07) | (0.00–0.05) | (0.00–0.04) | (0.00–4.04) | (0.00–0.61)   | (0.007–0.25)  | (0.00–0.11) | (0.1–1.6)     | (0.3–4.7)     | (0.5–43.8)   |
| Alcohol beverages | 0.02         | 0.16        | 0.04        | 0.04        | 0.07        | 0.24        | 0.38          | 0.10          | 0.04        | 1.2           | 3.4           | 9.5          |
|                   | (0.00–0.07)  | (0.00–0.34) | (0.00–0.33) | (0.00–0.08) | (0.00–0.16) | (0.00–1.29) | (0.03–1.84)   | (0.02–2.22)   | (0.00–0.17) | (0.1–2.2)     | (0.3–25.9)    | (0.5–108.3)  |

Note: values not detected (ND) were treated as being equal to half of the limit of detection (LOD) while calculating the mean value.
